# Supplementary material
Source: Springer Nature journal article supplement (https://www.springermedizin.de/resource/supplementary/12885_2014_4909_MOESM5_ESM.pdf/9467692)

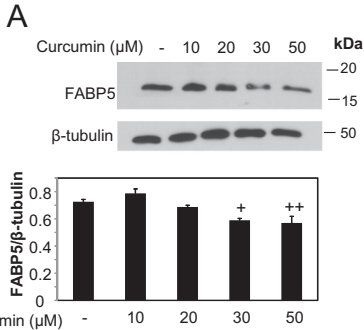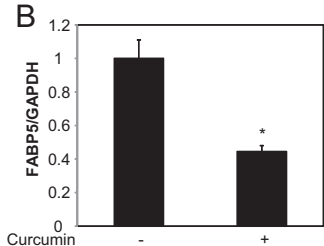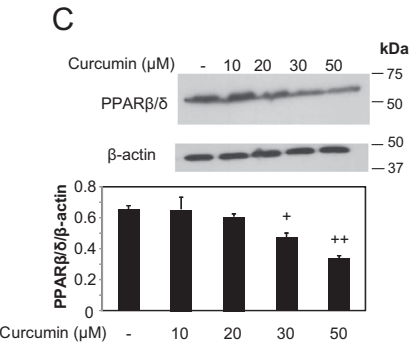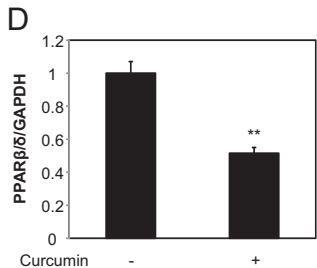

Supplement: MOESM5 [file 9467692]
